# Supplementary material for: Thermodynamics and Intermolecular Interactions of Nicotinamide in Neat and Binary Solutions: Experimental Measurements and COSMO-RS Concentration Dependent Reactions Investigations
Source: MDPI journal article supplement (doi:10.3390/ijms22147365), 2021-07-08
Supplement: s1 [file s1]

# Thermodynamics and Intermolecular Interactions of Nicotinamide in Neat and Binary Solutions: Experimental Measurements and COSMO-RS Concentration Dependent Reactions Investigations

Piotr Cysewski \*, Maciej Przybyłek, Anna Kowalska and Natalia Tymorek

Department of Physical Chemistry, Pharmacy Faculty, Collegium Medicum of Bydgoszcz, Nicolaus Copernicus University in Toruń, Kurpińskiego 5, 85-950 Bydgoszcz, Poland; m.przybylek@cm.umk.pl (M.P.); 288310@stud.umk.pl (A.K.); n.tymorek@wp.pl (N.T.)

\* Correspondence: Piotr.Cysewski@cm.umk.pl

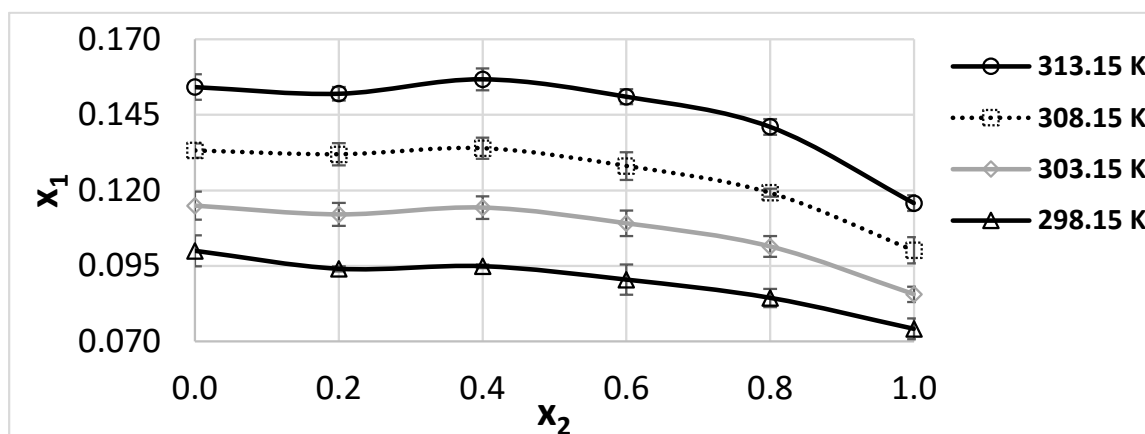

**Figure S1.** The solubility vs. temperature relationships of nicotinamide in methanol-water. The  $x_1$ ,  $x_2$  symbols denote molar fraction solubility and molar fraction of organic component in binary solvent, respectively. The error bars denote standard deviation values ( $n = 3$ ).

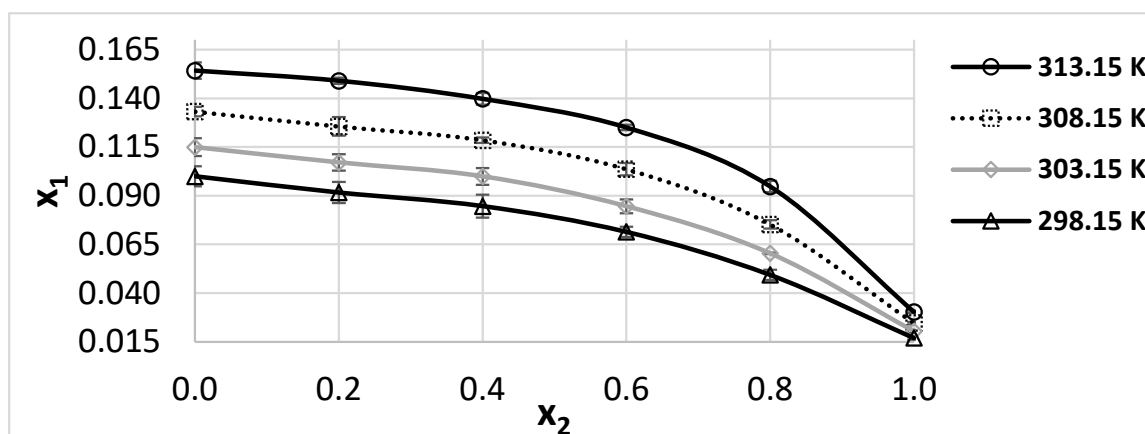

**Figure S2.** The solubility vs. temperature relationships of nicotinamide in 1,4-dioxane-water. The  $x_1$ ,  $x_2$  symbols denote molar fraction solubility and molar fraction of organic component in binary solvent, respectively. The error bars denote standard deviation values ( $n = 3$ ).

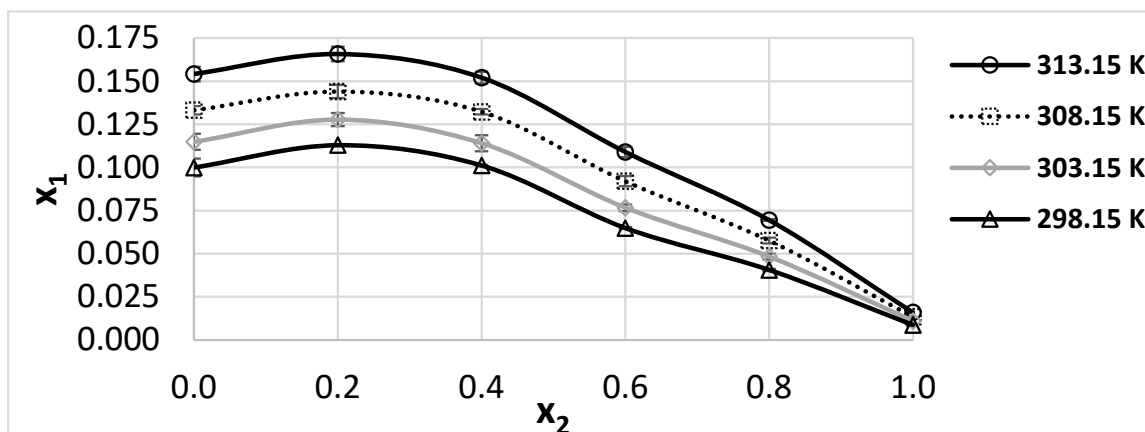

**Figure S3.** The solubility vs. temperature relationships of nicotinamide in acetonitrile-water. The  $x_1$ ,  $x_2$  symbols denote molar fraction solubility and molar fraction of organic component in binary solvent, respectively. The error bars denote standard deviation values ( $n = 3$ ).

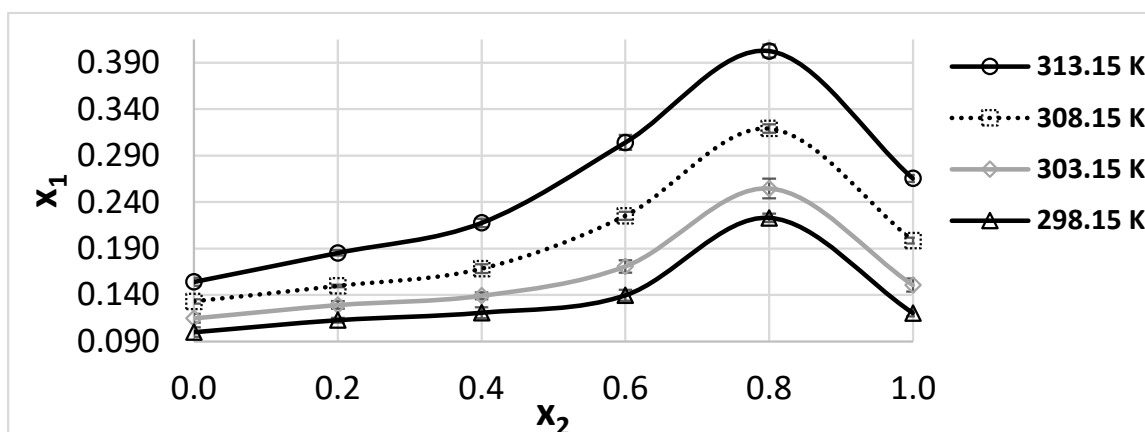

**Figure S4.** The solubility vs. temperature relationships of nicotinamide in DMSO-water. The  $x_1$ ,  $x_2$  symbols denote molar fraction solubility and molar fraction of organic component in binary solvent, respectively. The error bars denote standard deviation values ( $n = 3$ ).

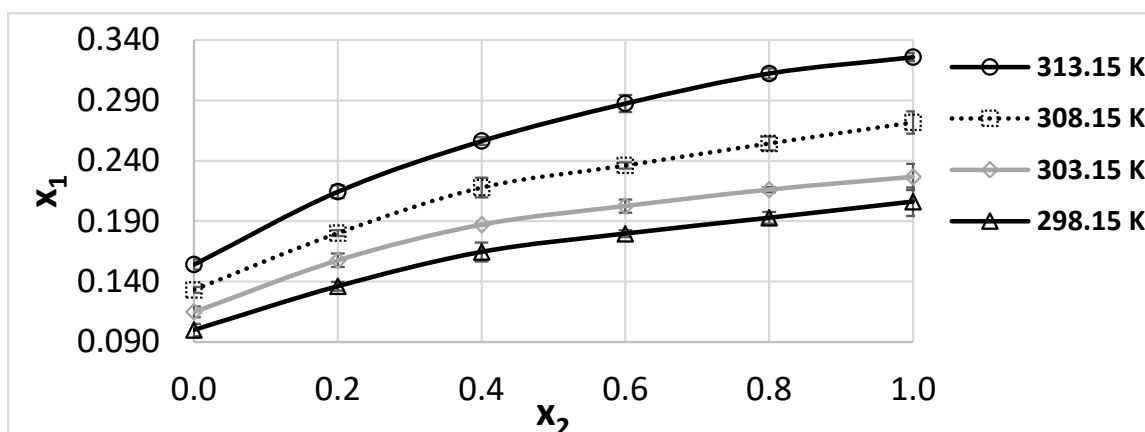

**Figure S5.** The solubility vs. temperature relationships of nicotinamide in DMF-water. The  $x_1$ ,  $x_2$  symbols denote molar fraction solubility and molar fraction of organic component in binary solvent, respectively. The error bars denote standard deviation values ( $n = 3$ ).
